# Supplementary material
Source: PubMed Central journal article supplement (PMC5478955)
Supplement: IAI.00097-17_zii999092081s3.pdf [file IAI.00097-17_zii999092081s3.pdf]

A.

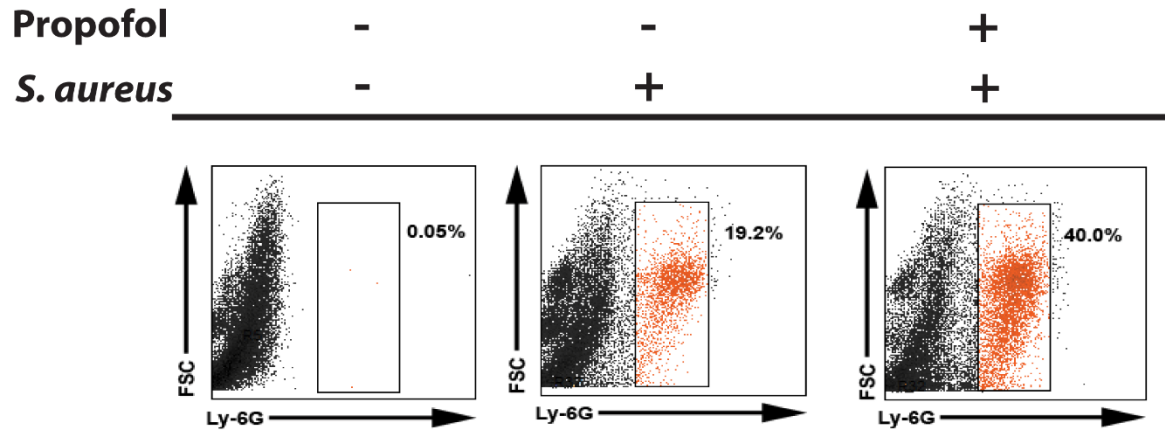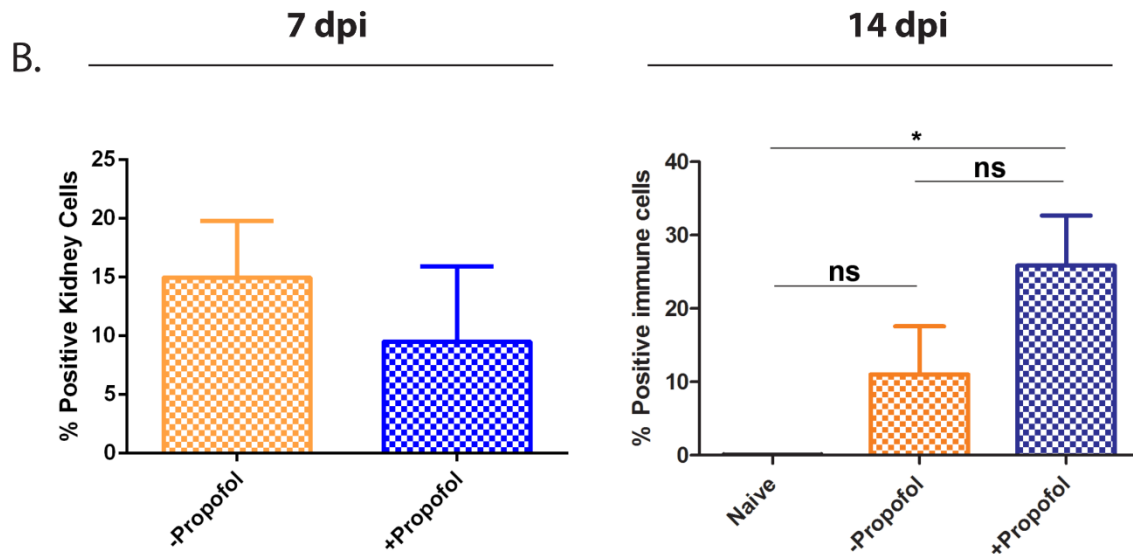

**Fig. S3: Propofol increases Ly-6G<sup>+</sup> cells in MRSA-infected kidneys.** Mice were infected with  $3 \times 10^6$  CFU of *S. aureus* via tail vein in the presence or absence of propofol. Animals were sacrificed at 7 and 14 days post infection and kidneys were processed for FACS analysis. Though no differences were observed at 7 dpi, propofol treated animals contained ~2x as many Ly-6G<sup>+</sup> cells (orange cell population) in the kidney as infected controls (S3b) at 14 dpi. Data representative of 2 independent experiments with 4-5 animals per treatment group. \* p<0.05.
